# Supplementary material
Source: bioRxiv or medRxiv preprint supplement (https://medrxiv.org/highwire/filestream/98476/field_highwire_adjunct_files/0/2020.09.28.20188466-1.pdf)
Supplement: Supplementary file [file 2020.09.28.20188466-1.pdf]

Supplementary Material

**Table S1.** Difference-in Difference (DiD) regression results (Michigan)

|                      | AS-ME                         |                         |                        | Influenza Vaccine              |                         | Spacer                          |                        |                         | Nebulizer                     |                         |                        |
|----------------------|-------------------------------|-------------------------|------------------------|--------------------------------|-------------------------|---------------------------------|------------------------|-------------------------|-------------------------------|-------------------------|------------------------|
|                      | Utilization Cost <sup>+</sup> | ED Visits <sup>++</sup> | IP Visits <sup>+</sup> | Utilization Cost <sup>++</sup> | PCP Visits <sup>+</sup> | Utilization Cost <sup>+++</sup> | ED Visits <sup>+</sup> | IP Visits <sup>++</sup> | Utilization Cost <sup>+</sup> | ED Visits <sup>++</sup> | IP Visits <sup>+</sup> |
|                      | Coef.                         | Coef.                   | Coef.                  | Coef.                          | Coef.                   | Coef.                           | Coef.                  | Coef.                   | Coef.                         | Coef.                   | Coef.                  |
| (Intercept)          | 1.991***                      | 0.101***                | 0.008***               | 0.888***                       | 0.236***                | 1.677***                        | 0.106***               | 0.004**                 | 0.924***                      | 0.015***                | 0.001                  |
| Urban                | 1.352***                      | 0.176***                | 0.017***               | 0.695***                       | 0.082***                | 1.129***                        | 0.189***               |                         | 0.716***                      | 0.049***                | 0.010***               |
| Suburban             | 0.412***                      | 0.037***                |                        | 0.176***                       | 0.041***                | 0.334***                        | 0.033***               |                         | 0.254***                      | 0.008*                  | 0.004***               |
| Age 9 - 17           | -0.463***                     | -0.074***               | -0.008***              | -0.122***                      |                         | -0.148***                       | -0.076***              | -0.006***               |                               | -0.008**                | -0.003*                |
| ASM                  |                               |                         |                        | 0.245***                       | 0.192***                | -0.236***                       |                        |                         | 0.171***                      |                         |                        |
| AMR                  |                               |                         | -0.010**               | -0.228***                      | -0.099***               |                                 |                        |                         |                               |                         |                        |
| IP visits            |                               | 0.438***                |                        |                                | 0.130***                |                                 |                        |                         |                               |                         |                        |
| PCP visits           |                               | 0.009***                |                        |                                |                         |                                 |                        | 0.003***                |                               |                         |                        |
| ED visits            |                               |                         |                        |                                | -0.027***               |                                 |                        | 0.075***                |                               |                         |                        |
| Non-asthma ED visits |                               |                         |                        |                                |                         |                                 |                        | 0.006***                | 0.439***                      |                         |                        |
| % with flu           |                               | -0.025***               | -0.004*                |                                |                         |                                 |                        |                         | 0.595***                      | -0.012***               | -0.003*                |
| % with spacers       |                               |                         | 0.011***               |                                | 0.096***                |                                 |                        |                         |                               |                         | 0.006***               |
| % with nebulizers    |                               |                         | 0.045***               | 1.700***                       | 0.185***                | 2.545***                        |                        |                         |                               |                         |                        |
| Year                 | 0.026                         | -0.011***               | -0.001                 | -0.131***                      | -0.116***               | 0.013                           | -0.019***              | -0.004**                | -0.116*                       | -0.007*                 | -0.002                 |
| Intervention 2010    | 2.332***                      | 0.312***                | 0.029***               | 0.446***                       | 0.121***                | 0.426***                        | -0.001                 | 0.007**                 | 1.763***                      | 0.263***                | 0.030***               |
| DiD Estimator = Year |                               |                         |                        |                                |                         |                                 |                        |                         |                               |                         |                        |
| * Intervention 2010  | -1.039***                     | -0.134***               | -0.022**               | -0.160**                       | -0.035***               | -0.171*                         | -0.015                 | -0.010**                | -0.120***                     | -0.208***               | -0.016***              |

Notes: \* p -value  $\leq 0.05$ , \*\* p -value  $\leq 0.01$ , \*\*\* p-value  $\leq 0.001$ , +  $0.05 \leq R^2 < 0.1$ , ++  $0.1 \leq R^2 < 0.2$ , +++  $0.2 \leq R^2 < 0.3$

Abbreviations: AMR – Asthma medication ratio, ASM – Appropriate medications for people with asthma, AS-ME – Asthma self-management education, ED – Emergency department, IP – Inpatient (hospitalization), PCP – Primary care physician

**Table S2.** Difference-in Difference (DiD) regression results (New York)

|                                          | AS-ME                         |                          |                          |                        | Influenza Vaccine             |                         |                         |
|------------------------------------------|-------------------------------|--------------------------|--------------------------|------------------------|-------------------------------|-------------------------|-------------------------|
|                                          | Utilization Cost <sup>+</sup> | Med. Cost <sup>+++</sup> | ED Visits <sup>+++</sup> | IP Visits <sup>+</sup> | Utilization Cost <sup>+</sup> | Med. Cost <sup>++</sup> | PCP Visits <sup>+</sup> |
|                                          | Coef.                         | Coef.                    | Coef.                    | Coef.                  | Coef.                         | Coef.                   | Coef.                   |
| (Intercept)                              | 0.751 <sup>***</sup>          | 4.268 <sup>***</sup>     | 0.967 <sup>***</sup>     | 0.037 <sup>***</sup>   | 1.863 <sup>***</sup>          | 1.243 <sup>***</sup>    | 0.149 <sup>***</sup>    |
| Age 9 to 17                              | -0.065 <sup>***</sup>         | 0.647 <sup>***</sup>     | -0.079 <sup>***</sup>    | -0.018 <sup>***</sup>  |                               | 0.213 <sup>***</sup>    | -0.046 <sup>***</sup>   |
| ASM                                      | -0.291 <sup>***</sup>         |                          | -0.582 <sup>***</sup>    | 0.014 <sup>***</sup>   | 2.531 <sup>***</sup>          | 2.899 <sup>***</sup>    | 0.207 <sup>***</sup>    |
| AMR                                      | -0.193 <sup>***</sup>         | 2.464 <sup>***</sup>     | -0.265 <sup>***</sup>    | -0.026 <sup>***</sup>  | -0.317 <sup>***</sup>         | -0.199 <sup>***</sup>   | -0.115 <sup>***</sup>   |
| IP                                       |                               |                          |                          |                        |                               |                         | 0.050 <sup>***</sup>    |
| PCP                                      |                               |                          |                          |                        |                               |                         |                         |
| ED                                       |                               |                          |                          | 0.088 <sup>***</sup>   |                               |                         | -0.014 <sup>***</sup>   |
| Medication Cost                          |                               |                          |                          |                        |                               |                         | 0.0001 <sup>***</sup>   |
| Non-asthma ED visits                     | 0.228 <sup>***</sup>          | -0.085 <sup>***</sup>    |                          |                        | 0.126 <sup>***</sup>          |                         | 0.001 <sup>***</sup>    |
| % with flu                               | 0.142 <sup>***</sup>          |                          | -0.030 <sup>***</sup>    |                        |                               |                         |                         |
| % with spacers                           | -0.169 <sup>***</sup>         |                          | 0.096 <sup>***</sup>     | 0.015 <sup>***</sup>   |                               |                         | 0.070 <sup>***</sup>    |
| % with nebulizers                        |                               |                          |                          |                        | 0.370 <sup>***</sup>          | 0.355 <sup>***</sup>    | 0.226 <sup>***</sup>    |
| Year                                     | -0.072 <sup>***</sup>         | -0.368 <sup>***</sup>    | -0.001                   | -0.016 <sup>***</sup>  | -0.070 <sup>***</sup>         | -0.041 <sup>*</sup>     | 0.031 <sup>***</sup>    |
| Intervention 2010                        | 0.166 <sup>***</sup>          | 0.536 <sup>***</sup>     | 0.100 <sup>***</sup>     | 0.046 <sup>***</sup>   | 0.364 <sup>***</sup>          | 0.335 <sup>***</sup>    | 0.114 <sup>***</sup>    |
| DiD Estimator = Year * Intervention 2010 | -0.185 <sup>***</sup>         | -0.163 <sup>**</sup>     | -0.060 <sup>***</sup>    | -0.035 <sup>***</sup>  | -0.179 <sup>***</sup>         | -0.170 <sup>***</sup>   | -0.060 <sup>***</sup>   |

**Table S2.** Difference-in Difference (DiD) regression results (New York) (continued)

|                      | Spacer                        |                           |                          |                         | Nebulizer                     |                           |                          |                        |
|----------------------|-------------------------------|---------------------------|--------------------------|-------------------------|-------------------------------|---------------------------|--------------------------|------------------------|
|                      | Utilization Cost <sup>+</sup> | Med. Cost <sup>++++</sup> | ED Visits <sup>+++</sup> | IP Visits <sup>++</sup> | Utilization Cost <sup>+</sup> | Med. Cost <sup>++++</sup> | ED Visits <sup>+++</sup> | IP Visits <sup>+</sup> |
|                      | Coef.                         | Coef.                     | Coef.                    | Coef.                   | Coef.                         | Coef.                     | Coef.                    | Coef.                  |
| (Intercept)          | 0.728***                      | 2.408***                  | 0.680***                 | 0.035***                | 1.258***                      | 2.254***                  | 0.916***                 | 0.020***               |
| Age 9 to 17          |                               | 0.255***                  | -0.131***                | -0.018***               | -0.066***                     | 0.349***                  | -0.029***                | -0.012***              |
| ASM                  | -0.318***                     | 0.373***                  |                          | 0.014***                | -0.783***                     | 3.731***                  | -0.810***                | 0.015***               |
| AMR                  | -0.179***                     |                           | -0.612***                | -0.026***               | -0.248***                     | 0.410***                  |                          | -0.022***              |
| IP                   |                               |                           |                          |                         |                               |                           |                          |                        |
| PCP                  |                               | 0.042***                  |                          |                         |                               |                           |                          |                        |
| ED                   |                               | 0.029***                  |                          | 0.087***                |                               |                           |                          | 0.128***               |
| Medication Cost      |                               |                           |                          |                         |                               |                           |                          |                        |
| Non-asthma ED visits | 0.243***                      |                           |                          | -0.002***               |                               |                           |                          | -0.002*                |
| % with flu           | 0.155***                      |                           | -0.033***                |                         | 0.146***                      |                           | -0.026***                |                        |
| % with spacers       |                               |                           |                          |                         | -0.155***                     |                           |                          | 0.025***               |
| % with nebulizers    |                               |                           |                          |                         |                               |                           |                          |                        |
| Year                 | -0.071***                     | -0.449***                 | -0.004#                  | -0.015***               | -0.060***                     | -0.421***                 | -0.005*                  | -0.009***              |
| Intervention 2010    | 0.175***                      | 0.032                     | 0.053***                 | 0.042***                | 0.193***                      | 0.112***                  | 0.188***                 | 0.026***               |
| DiD Estimator = Year |                               |                           |                          |                         |                               |                           |                          |                        |
| * Intervention 2010  | -0.112**                      | -0.070#                   | -0.021*                  | -0.020***               | -0.115***                     | -0.057*                   | -0.124***                | -0.008*                |

Notes: # p ≤ 0.1, \* p-value ≤ 0.05, \*\* p-value ≤ 0.01, \*\*\* p-value ≤ 0.001, + 0.05 ≤ R<sup>2</sup> < 0.1, ++ 0.1 ≤ R<sup>2</sup> < 0.2, +++ 0.2 ≤ R<sup>2</sup> < 0.3, ++++ 0.3 ≤ R<sup>2</sup> < 0.4.

Abbreviations: AMR – Asthma medication ratio, ASM – Appropriate medications for people with asthma, AS-ME – Asthma self-management education, ED – Emergency department, IP – Inpatient (hospitalization), PCP – Primary care physician

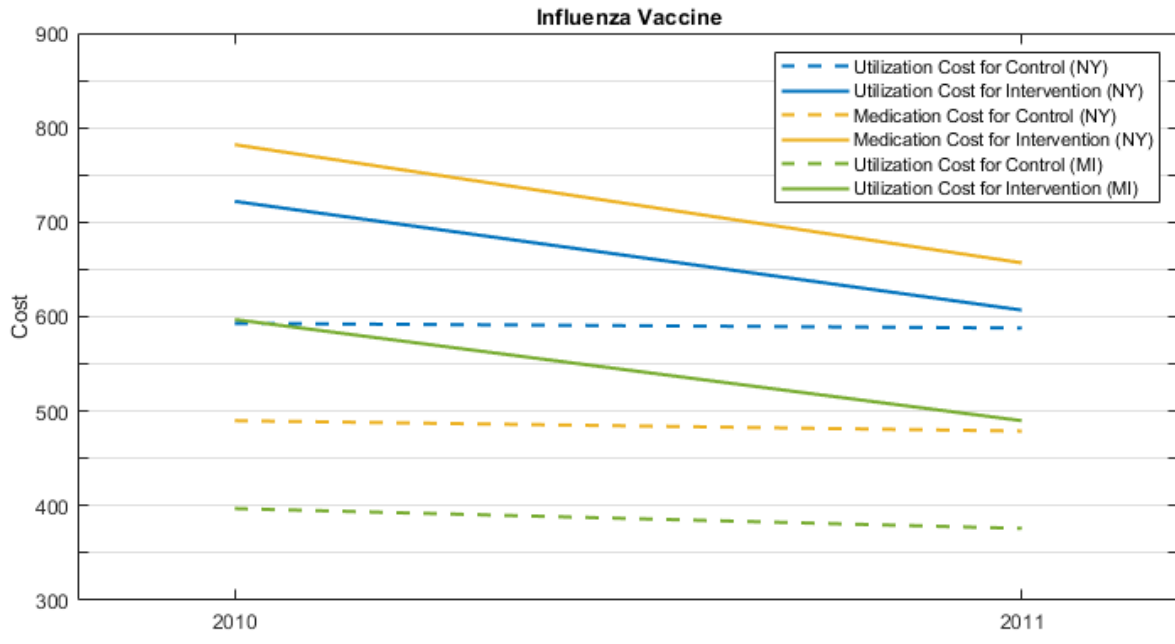

Figure S1. Cost trendlines for influenza vaccine

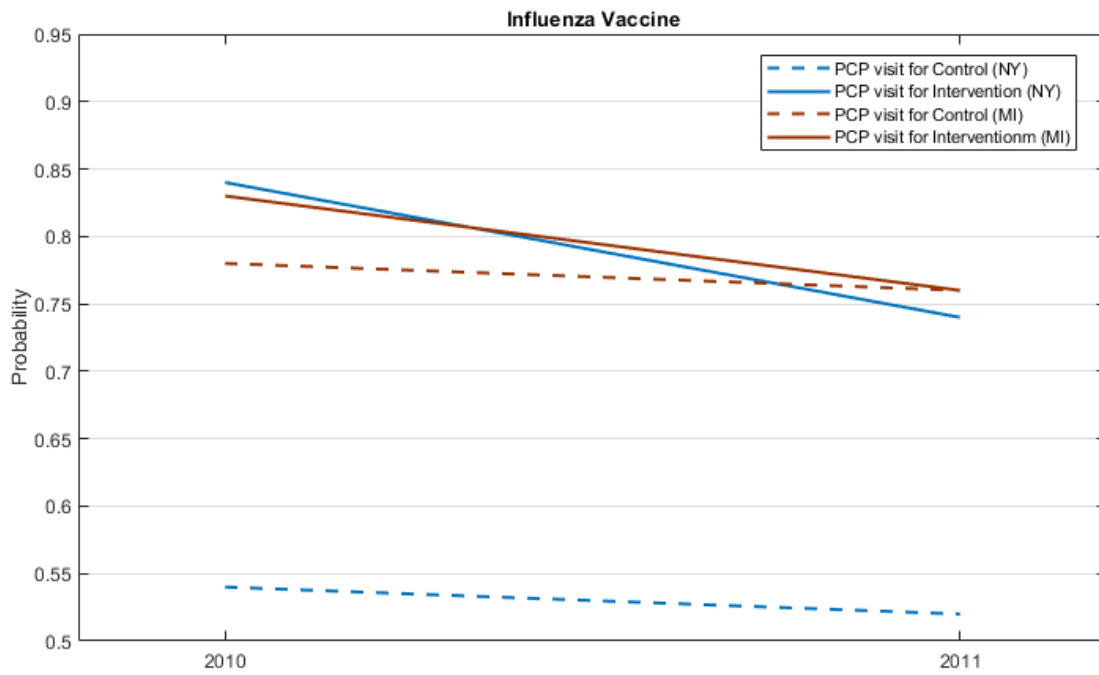

Figure S2. Probability of utilization trendlines for influenza vaccine

Abbreviations: AS-ME – Asthma self-management education, ED – Emergency department, IP – Inpatient (hospitalization), PCP – Primary care physician

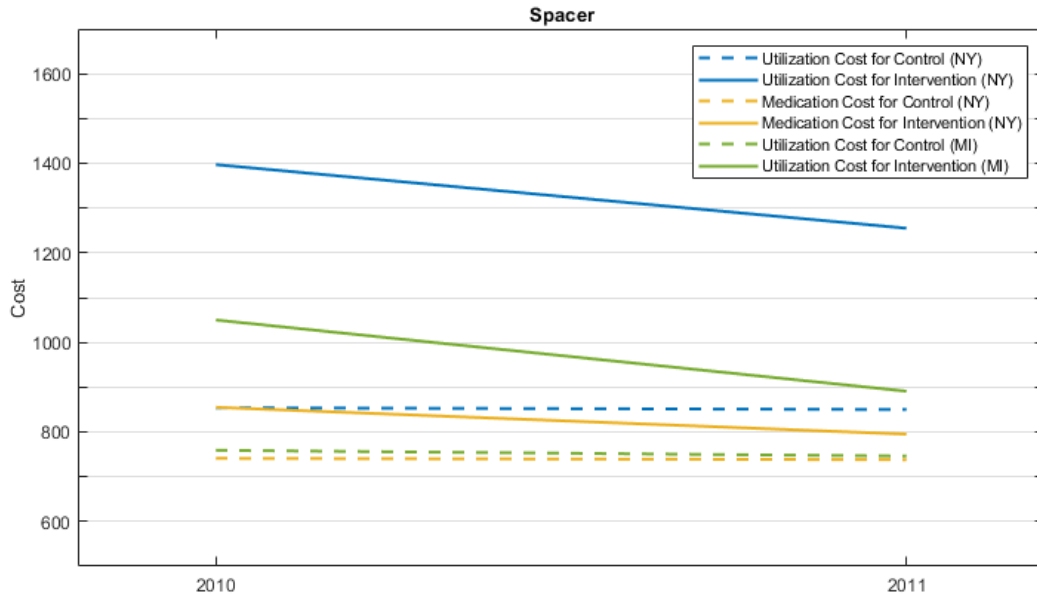

Figure S3. Cost trendlines for spacer

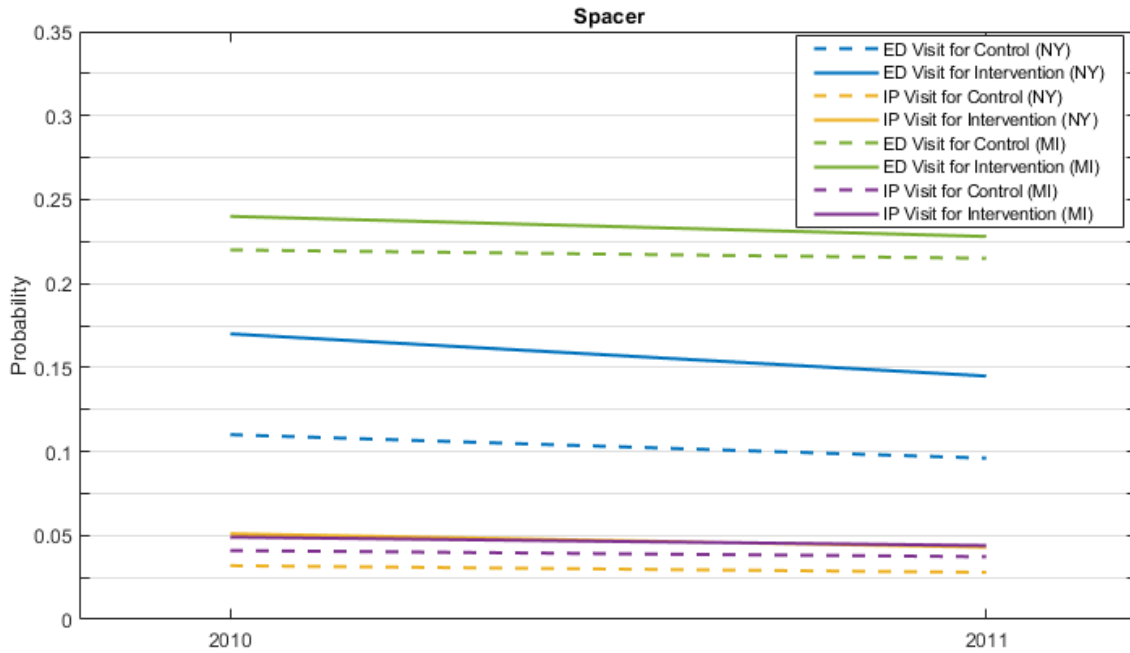

Figure S4. Probability of utilization trendlines for spacer

Abbreviations: AS-ME – Asthma self-management education, ED – Emergency department, IP – Inpatient (hospitalization), PCP – Primary care physician

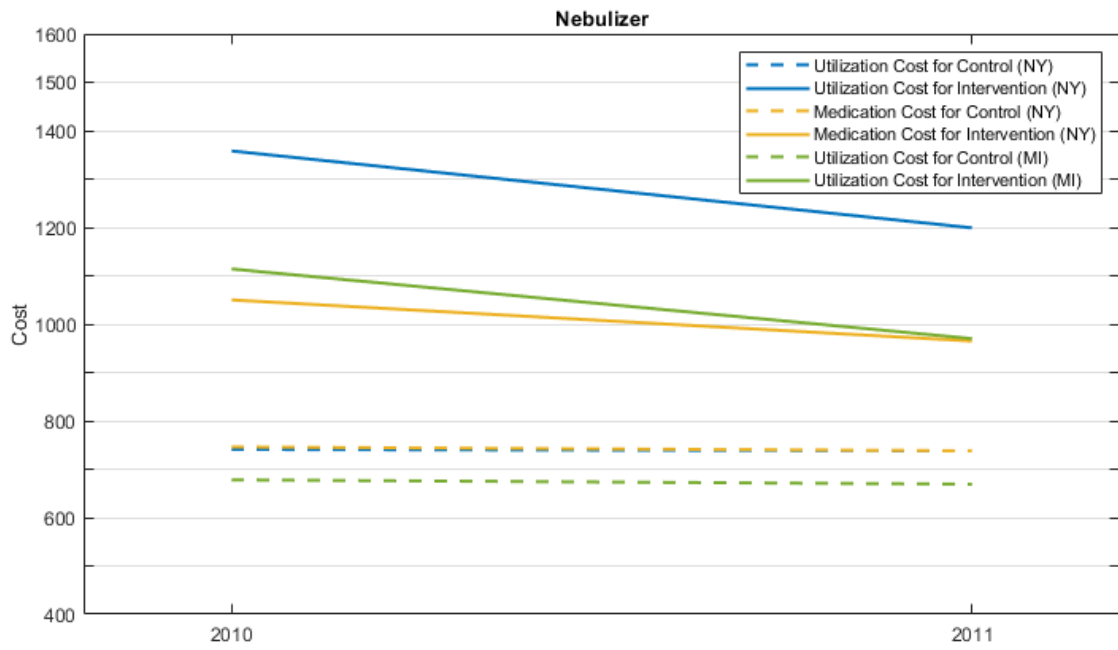

Figure S5. Cost trendlines for nebulizer



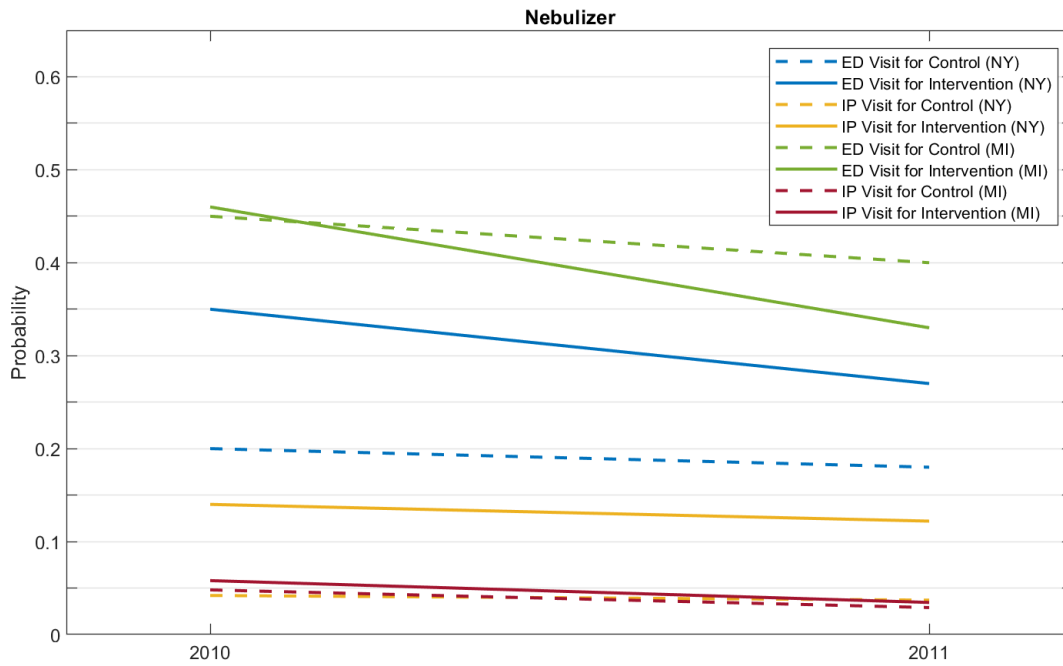

Figure S6. Probability of utilization trendlines for nebulizer

Abbreviations: AS-ME – Asthma self-management education, ED – Emergency department, IP – Inpatient (hospitalization), PCP – Primary care physician
